# Supplementary material for: Evolution of extended-spectrum β-lactamase-producing ST131 Escherichia coli at a single hospital over 15 years
Source: PubMed Central journal article supplement — Sci Rep. 2024 Aug 26;14:19750. doi: 10.1038/s41598-024-70540-1 (PMC11347647; doi:10.1038/s41598-024-70540-1), 2024-08-26
Supplement: 41598_2024_70540_MOESM1_ESM.pdf [file 41598_2024_70540_MOESM1_ESM.pdf]

## **Supplementary Information**

Evolution of extended-spectrum b-lactamase-producing ST131 *Escherichia coli* at a single hospital over 15 years

Shu-Ting Cho, Emma G. Mills, Marissa P. Griffith, Hayley R. Nordstrom, Christi L. McElheny, Lee H. Harrison, Yohei Doi, Daria Van Tyne

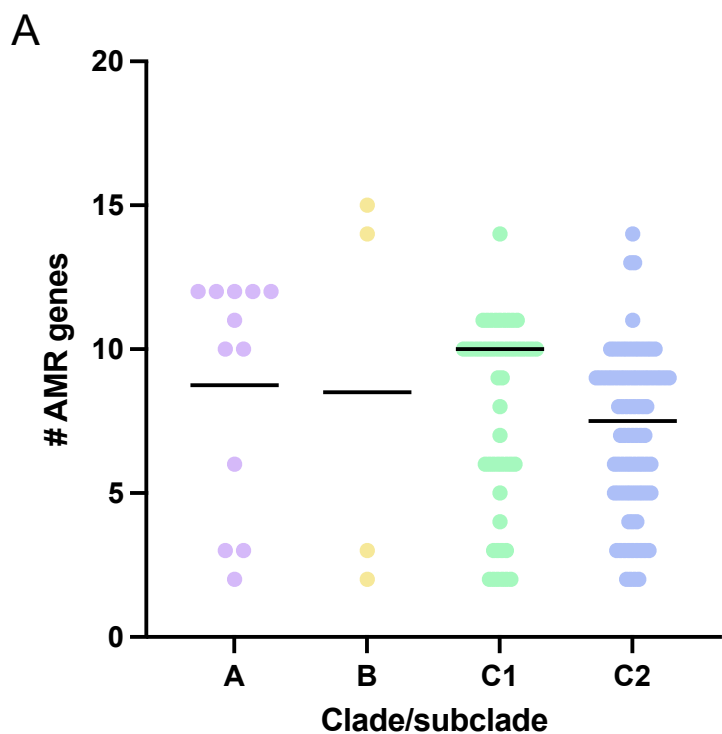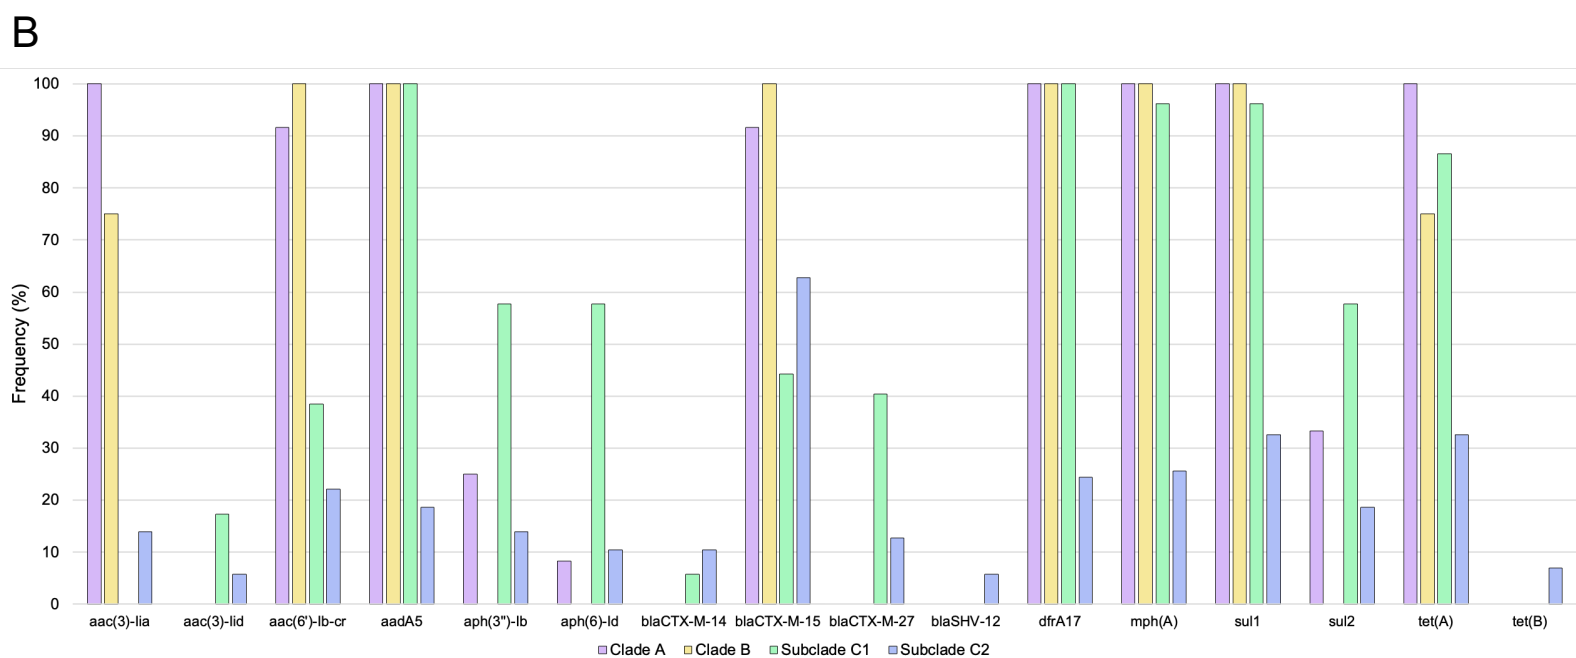

**Figure S1. Differences in antimicrobial resistance (AMR) gene content between ST131 clades and subclades.** (A) AMR gene abundance in isolates belonging to different ST131 clades and subclades. Each gene is counted once per genome. Horizontal lines show median values of AMR genes per genome in each isolate. AMR genes were identified by BLASTN to the ResFinder database. (B) Frequency of individual AMR genes among isolates in each clade or subclade. Genes with notable frequency differences between groups are shown. Complete data on AMR genes is provided in Table S2.



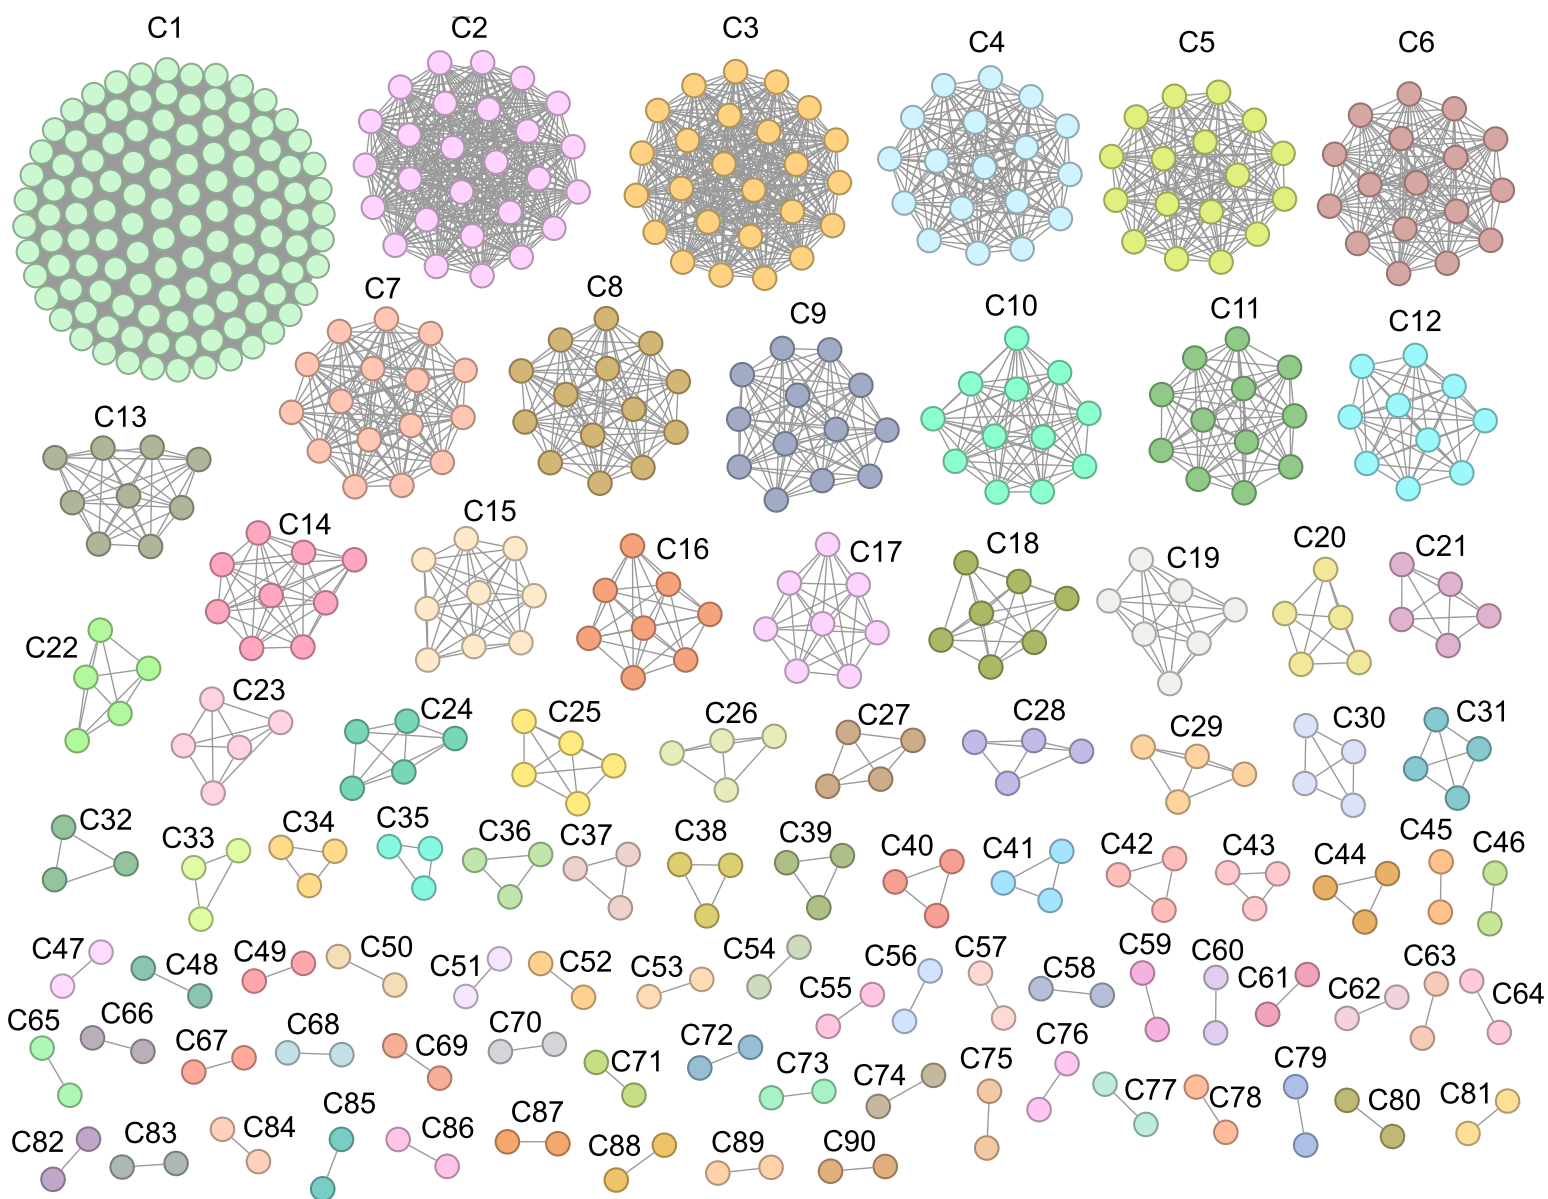

**Figure S3. Prophage clusters of high genetic similarity among 154 ST131 *E. coli* isolates.** Prophages were identified using PHASTEST. Sequences of prophages predicted to be intact or questionable were extracted and compared to one another via all-by-all BLASTN analysis. Prophages that had  $\geq 90\%$  nucleotide similarity and  $\geq 90\%$  sequence coverage were grouped together into clusters, with cluster number noted by C#.

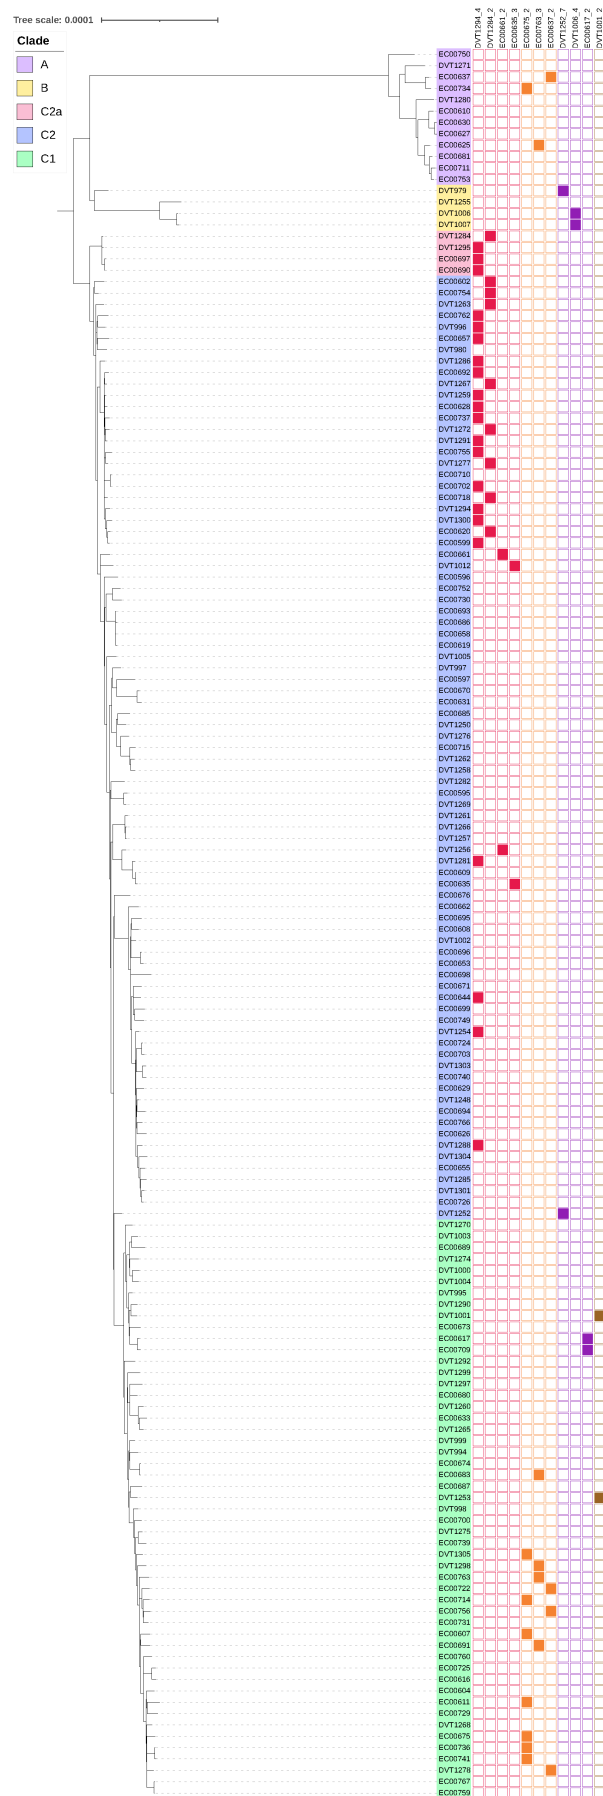

**Figure S4. Distribution of ESBL-encoding plasmids among ST131 *E. coli* isolates.** The core genome phylogeny is annotated with the presence of 11 ESBL-encoding reference plasmids detected in more than one genome in the dataset. Plasmids DVT1294\_4 (Unknown Rep/Inc Type), DVT1284\_2 (IncFIA, IncFIC, IncFII), EC00661\_2 (IncFIA, IncFIC, IncFII), and EC00635\_3 (Unknown Rep/Inc Type) harbor *bla*<sub>CTX-M-15</sub> (red); plasmids EC00675\_2 (IncFIA, IncFIA, IncFIB), EC00763\_3 (Unknown Rep/Inc Type), and EC00637\_2 (IncFIA, IncFIA, IncFIB, rep\_cluster\_2131) harbor *bla*<sub>CTX-M-27</sub> (orange); plasmids DVT1252\_7 (Unknown Rep/Inc Type), DVT1006\_4 (Unknown Rep/Inc Type), and EC00617\_2 (IncFIA, IncFIA, IncFIB, IncN, rep\_cluster\_2131) harbor *bla*<sub>SHV-12</sub> (purple); and plasmid DVT1001\_2 harbors *bla*<sub>CTX-M-2</sub> (brown).

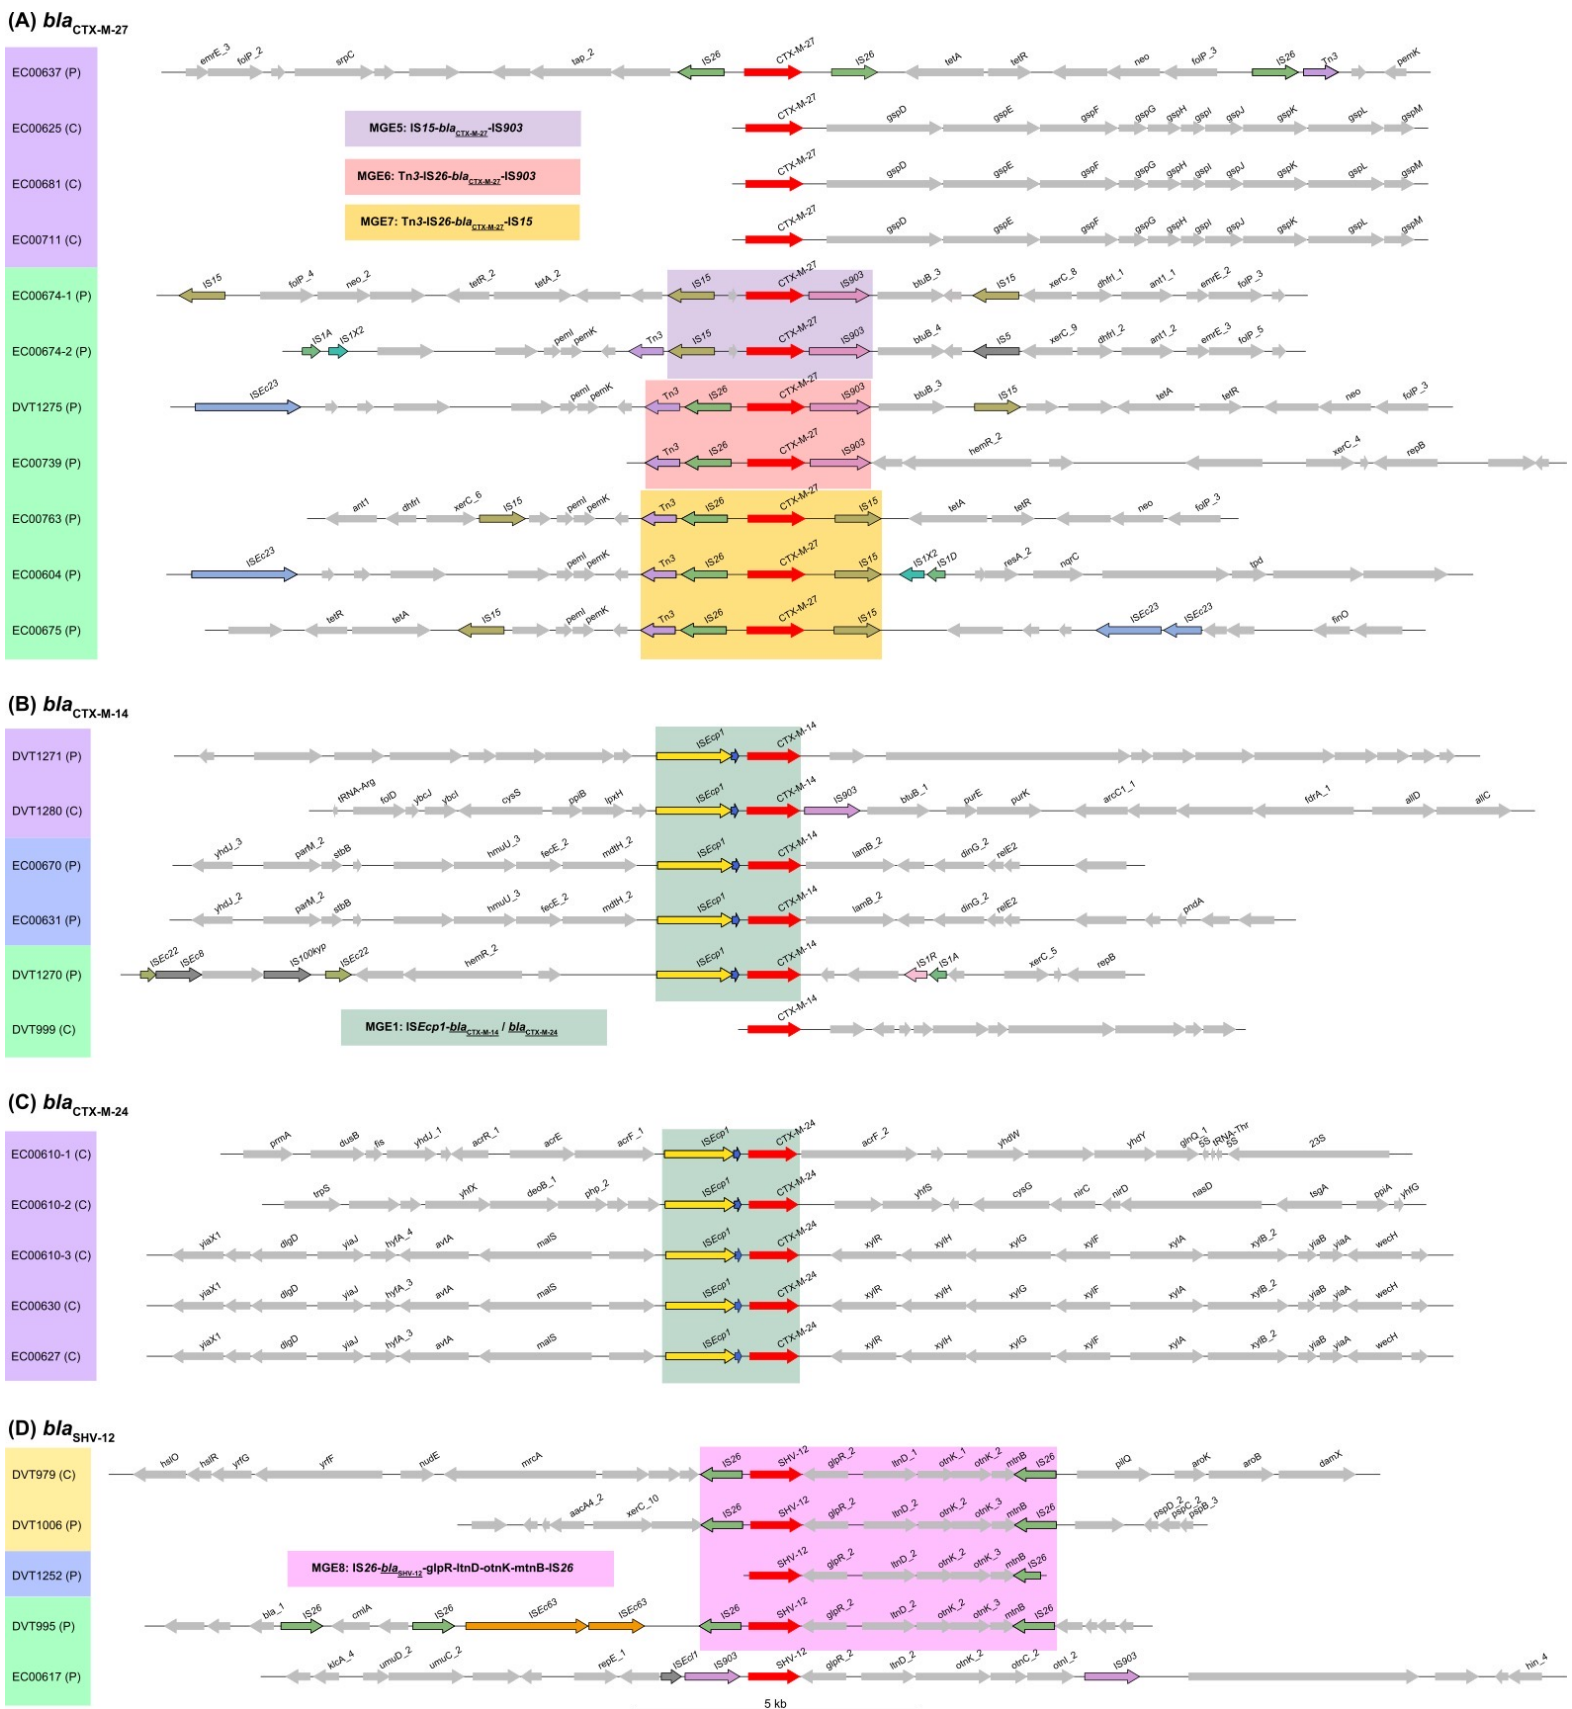

**Figure S5. Regions flanking ESBL genes among ST131 *E. coli* isolates.** (A-D) Genomic context of different ESBL-carrying MGEs is shown. Isolate names are shaded based on their phylogenetic clade assignments (clade A=purple; subclade C1=green; subclade C2=blue; clade B=yellow). The genomic context of each sequence is indicated (C=chromosome, P=plasmid) and ESBL genes are colored red. Genes were annotated with Prokka, and genes with predicted functions are labeled. Genes associated with MGEs and transposases are highlighted with black outlines and are colored if found in more than one region. Regions that were used for MGE classification are shaded in each panel.
